# Supplementary material for: Growth Performance, Metabolomics, and Microbiome Responses of Weaned Pigs Fed Diets Containing Growth-Promoting Antibiotics and Various Feed Additives
Source: MDPI journal article supplement (doi:10.3390/ani14010060), 2023-12-23
Supplement: s1 [file s1]

**Table S1.** Summary of chemical compounds identified in chemometrics analysis of feed additives.

1

| Chemical compounds*                                    | Essential oil and herbal blends |       |       | Phytogenic extracts |     |     |     | Milk-derived substances |       | Yeast products |      |      |
|--------------------------------------------------------|---------------------------------|-------|-------|---------------------|-----|-----|-----|-------------------------|-------|----------------|------|------|
|                                                        | PHY01                           | PHY02 | PHY03 | TUM                 | GAR | BOE | SOE | VM01                    | VSM02 | YN01           | YN02 | YC03 |
| Free amino acids                                       |                                 |       |       |                     |     |     |     |                         |       | +              | +    | +    |
| Choline                                                | +                               | +     | +     |                     |     |     |     |                         |       |                |      |      |
| Glycine                                                | +                               | +     | +     |                     |     |     |     |                         |       |                |      |      |
| Pipecolic acid                                         | +                               | +     | +     |                     |     |     |     |                         |       |                |      |      |
| Dipeptides                                             |                                 |       |       |                     |     |     |     |                         |       | +              | +    | +    |
| Betaine                                                | +                               | +     | +     |                     |     | +   |     |                         |       |                |      |      |
| Flavonoids<br>(nobiletin,<br>tangeritin,<br>quercetin) |                                 |       |       |                     |     | +   | +   |                         |       |                |      |      |
| Piperine                                               | +                               |       |       |                     |     |     |     |                         |       |                |      |      |
| Quinic acid                                            |                                 |       |       |                     |     |     |     |                         | +     |                |      |      |
| Curcumin                                               |                                 | +     |       | +                   |     |     |     |                         |       |                |      |      |
| Ibervirin                                              |                                 |       |       |                     | +   |     |     |                         |       |                |      |      |

\* Feed additives were proprietary products of essential oil and herbal blends (PHY01, PHY02, PHY03); phytogenic extracts comprised of turmeric (TUM), garlic (GAR), bitter orange (BOE), and sweet orange (SOE); volatile milk-derived substances (VM01) and volatile and semi-volatile milk-derived substances (VSM02); yeast nucleotide mixtures (YN01, YN02) and a yeast cell wall mixture (YC03). Additives designated with + contained one or more of the chemical compounds listed.

2  
3  
4  
5  
6  
7

**Table S2.** Serum amino acid concentrations of pigs fed antibiotics, essential oils and herbal blends, and phytogetic extracts from experiment 1.

| Amino acid, $\mu\text{M}$ | Dietary treatments <sup>1</sup> |       |       |       |       |       |       | <i>P</i> -value <sup>2</sup> |
|---------------------------|---------------------------------|-------|-------|-------|-------|-------|-------|------------------------------|
|                           | NC                              | PC    | PHY01 | PHY02 | PHY03 | TUM   | GAR   |                              |
| Alanine                   | 351                             | 363   | 414   | 339   | 363   | 320   | 391   | 0.466                        |
| Arginine                  | 263                             | 305   | 306   | 237   | 277   | 320   | 391   | 0.734                        |
| Asparagine                | 116                             | 128   | 163   | 125   | 122   | 95    | 149   | 0.610                        |
| Aspartic acid             | 4                               | 4     | 5     | 4     | 5     | 6     | 5     | 0.707                        |
| Citrulline                | 20                              | 35    | 36    | 32    | 29    | 27    | 29    | 0.504                        |
| Glutamic acid             | 172                             | 189   | 193   | 185   | 212   | 210   | 238   | 0.845                        |
| Glutamine                 | 728                             | 798   | 824   | 728   | 792   | 664   | 820   | 0.909                        |
| Glycine                   | 1,411                           | 1,515 | 1,492 | 1,277 | 1,508 | 1,252 | 1,414 | 0.956                        |
| Histidine                 | 43                              | 57    | 55    | 42    | 50    | 39    | 45    | 0.677                        |
| Leucine-Isoleucine        | 239                             | 335   | 358   | 245   | 311   | 282   | 309   | 0.883                        |
| Lysine                    | 285                             | 335   | 358   | 245   | 311   | 282   | 309   | 0.883                        |
| Methionine                | 22                              | 20    | 22    | 20    | 17    | 17    | 18    | 0.880                        |
| Ornithine                 | 74                              | 91    | 91    | 77    | 85    | 71    | 86    | 0.835                        |
| Phenylalanine             | 125                             | 147   | 144   | 128   | 126   | 107   | 122   | 0.533                        |
| Proline                   | 484                             | 507   | 539   | 455   | 517   | 425   | 523   | 0.778                        |
| Serine                    | 175                             | 185   | 226   | 204   | 181   | 153   | 220   | 0.646                        |
| Taurine                   | 22                              | 51    | 32    | 22    | 41    | 33    | 24    | 0.267                        |
| Threonine                 | 429                             | 351   | 351   | 293   | 262   | 251   | 339   | 0.132                        |
| Tryptophan                | 53                              | 65    | 64    | 46    | 52    | 45    | 48    | 0.539                        |
| Tyrosine                  | 82                              | 95    | 94    | 75    | 74    | 60    | 82    | 0.365                        |
| Valine                    | 280                             | 321   | 316   | 246   | 274   | 240   | 283   | 0.409                        |

<sup>1</sup> Dietary treatments include antibiotic (PC), no antibiotic (NC), essential oil and herbal blend 1 (PHY01), essential oil and herbal blend 2 (PHY02), essential oil and herb blend 3 (PHY03), turmeric (TUM), and garlic (GAR).

<sup>2</sup> *P*-value from Kruskal Wallis one-way analysis of variance.

**Table S3.** Serum amino acid concentrations of pigs fed antibiotics, phytogetic extracts, and milk-derived substances from experiment 2.

20

| Amino acid, $\mu\text{M}$ | Dietary treatments <sup>1</sup> |       |       |       |       |       | <i>P</i> -value <sup>2</sup> |
|---------------------------|---------------------------------|-------|-------|-------|-------|-------|------------------------------|
|                           | NC                              | PC    | BOE   | SOE   | VM01  | VSM02 |                              |
| Alanine                   | 504                             | 529   | 482   | 542   | 438   | 468   | 0.385                        |
| Arginine                  | 292                             | 345   | 297   | 337   | 283   | 285   | 0.340                        |
| Asparagine                | 123                             | 148   | 139   | 141   | 107   | 117   | 0.818                        |
| Aspartic acid             | 5                               | 6     | 6     | 7     | 5     | 7     | 0.607                        |
| Citrulline                | 31                              | 32    | 32    | 38    | 38    | 35    | 0.884                        |
| Glutamic acid             | 247                             | 181   | 234   | 246   | 176   | 235   | 0.406                        |
| Glutamine                 | 749                             | 892   | 813   | 973   | 768   | 779   | 0.078                        |
| Glycine                   | 1,594                           | 1,745 | 1,756 | 1,621 | 1,461 | 1,682 | 0.258                        |
| Histidine                 | 56                              | 77    | 54    | 65    | 57    | 55    | 0.369                        |
| Leucine-Isoleucine        | 299                             | 325   | 282   | 313   | 272   | 294   | 0.771                        |
| Lysine                    | 387                             | 444   | 335   | 404   | 292   | 367   | 0.301                        |
| Methionine                | 15                              | 15    | 13    | 22    | 9     | 12    | 0.338                        |
| Ornithine                 | 120                             | 128   | 116   | 128   | 102   | 126   | 0.764                        |
| Phenylalanine             | 142                             | 178   | 143   | 170   | 156   | 138   | 0.556                        |
| Proline                   | 597                             | 635   | 566   | 626   | 524   | 547   | 0.203                        |
| Serine                    | 254                             | 317   | 241   | 320   | 211   | 259   | 0.362                        |
| Taurine                   | 124                             | 223   | 117   | 148   | 123   | 161   | 0.127                        |
| Threonine                 | 385                             | 451   | 402   | 484   | 349   | 333   | 0.224                        |
| Tryptophan                | 78                              | 87    | 67    | 79    | 69    | 60    | 0.551                        |
| Tyrosine                  | 81                              | 91    | 72    | 94    | 76    | 71    | 0.562                        |
| Valine                    | 364                             | 421   | 342   | 365   | 315   | 356   | 0.432                        |

<sup>1</sup> Dietary treatments include antibiotic (PC), no antibiotic (NC), bitter orange extract (BOE), sweet orange extract (SOE), volatile milk-derived substances (VM01), and volatile and semi-volatile milk-derived substances (VSM02).

<sup>2</sup> *P*-value from Kruskal Wallis one-way analysis of variance.

21

22

23

24

**Table S4.** Serum amino acid concentrations of pigs fed antibiotics and yeast products from experiment 3.

| Amino acid, $\mu\text{M}$ | Dietary treatments <sup>1</sup> |                  |                  |                  |                  | <i>P</i> -value <sup>2</sup> |
|---------------------------|---------------------------------|------------------|------------------|------------------|------------------|------------------------------|
|                           | NC                              | PC               | YN01             | YN02             | YC03             |                              |
| Alanine                   | 430                             | 391              | 400              | 444              | 414              | 0.444                        |
| Arginine                  | 266                             | 298              | 264              | 255              | 252              | 0.144                        |
| Asparagine                | 140                             | 136              | 126              | 142              | 134              | 0.993                        |
| Aspartic acid             | 7                               | 6                | 5                | 5                | 6                | 0.427                        |
| Citrulline                | 47                              | 41               | 57               | 46               | 31               | 0.118                        |
| Glutamic acid             | 291                             | 316              | 236              | 259              | 245              | 0.649                        |
| Glutamine                 | 749                             | 764              | 689              | 713              | 683              | 0.517                        |
| Glycine                   | 1,508                           | 1,605            | 1,481            | 1,642            | 1,502            | 0.899                        |
| Histidine                 | 49                              | 66               | 55               | 55               | 54               | 0.580                        |
| Leucine-Isoleucine        | 263                             | 285              | 268              | 285              | 261              | 0.735                        |
| Lysine                    | 285 <sup>a</sup>                | 424 <sup>b</sup> | 330 <sup>a</sup> | 329 <sup>a</sup> | 300 <sup>a</sup> | 0.037                        |
| Methionine                | 18                              | 16               | 23               | 15               | 17               | 0.860                        |
| Ornithine                 | 120                             | 129              | 123              | 123              | 115              | 0.849                        |
| Phenylalanine             | 126                             | 154              | 120              | 120              | 132              | 0.207                        |
| Proline                   | 505                             | 510              | 479              | 511              | 489              | 0.868                        |
| Serine                    | 190                             | 206              | 201              | 239              | 246              | 0.120                        |
| Taurine                   | 27                              | 34               | 50               | 54               | 19               | 0.210                        |
| Threonine                 | 241                             | 284              | 280              | 258              | 249              | 0.924                        |
| Tryptophan                | 58                              | 72               | 61               | 58               | 59               | 0.548                        |
| Tyrosine                  | 64                              | 58               | 64               | 65               | 65               | 0.972                        |
| Valine                    | 272                             | 327              | 315              | 293              | 283              | 0.351                        |

<sup>1</sup> Dietary treatments include antibiotic (PC), no antibiotic (NC), yeast nucleotide product 1 (YN01), yeast nucleotide product 2 (YN02), and yeast cell wall (YC03) product.

<sup>2</sup> *P*-value from Kruskal Wallis one-way analysis of variance.

<sup>a,b</sup> Means within a row with uncommon superscripts differ ( $P < 0.05$ ).

**Table S5.** Serum metabolites with high abundance and specificity to pigs fed antibiotics, essential oils and herbal blends, phytogetic extracts, milk-derived substances, and yeast products compared with pigs fed the negative control diets.

| Metabolite <sup>1</sup> | Metabolite identification <sup>2</sup> | Experiment | Treatment <sup>3</sup> | Indicator value <sup>4</sup> | Negative control mean <sup>5</sup> ± standard deviation | Treatment mean <sup>5</sup> ± standard deviation | P-value <sup>6</sup> |
|-------------------------|----------------------------------------|------------|------------------------|------------------------------|---------------------------------------------------------|--------------------------------------------------|----------------------|
| 3.31_321.1015 DC        |                                        | 1          | PC                     | 0.997                        | 0 ± 0                                                   | 0.007 ± 0.002                                    | 0.001                |
| 3.04_279.0921 HQ        | Sulfadimidine                          | 1          | PC                     | 0.996                        | 0 ± 0.001                                               | 0.055 ± 0.021                                    | 0.001                |
| 3.04_279.0921 HQ        | Sulfadimidine                          | 2          | PC                     | 0.985                        | 0.001 ± 0.003                                           | 0.066 ± 0.017                                    | 0.000                |
| 7.90_221.0204 HQ        |                                        | 2          | BOE                    | 0.875                        | 0 ± 0.001                                               | 0.003 ± 0.002                                    | 0.002                |
| 3.04_279.0921 HQ        | Sulfadimidine                          | 3          | PC                     | 0.980                        | 0.001 ± 0.003                                           | 0.062 ± 0.014                                    | 0.001                |
| 4.45_264.0803 DC        |                                        | 3          | PC                     | 0.875                        | 0.003 ± 0                                               | 0.079 ± 0.059                                    | 0.003                |

<sup>1</sup>Metabolite characteristics listed as retention time-mass method of derivatization used [either negative mode (ne), positive mode (po), dansyl chloride (DC), or 2-hydrazinoquinoline (HQ)].

<sup>2</sup>Metabolite identification based on database search of the adjusted mass. Identification was left blank if no metabolite was identified with this mass.

<sup>3</sup>Dietary treatments include antibiotics (PC), bitter orange extract (BOE).

<sup>4</sup>The indicator value is a product of frequency and abundance and ranges from 0 to 1. Greater indicator values show that a given taxon is more abundant in all samples from a given group compared with other groups. The table shows indicator values greater than 0.8, indicating that the selected metabolites are faithful biomarkers of a given treatment.

<sup>5</sup>Means expressed as relative abundance with respect to all metabolites (%).

<sup>6</sup>P-value from Kruskal Wallis one-way analysis of variance.

**Table S6.** Effects of dietary antibiotics, essential oil and herbal extracts, and phytogetic extracts on amino acid, short chain fatty acid, and bile acid concentrations in cecal contents from experiment 1.

| Analyte                        | Dietary treatments <sup>1</sup> |       |       |       |        |       |        | <i>P</i> -value <sup>2</sup> |
|--------------------------------|---------------------------------|-------|-------|-------|--------|-------|--------|------------------------------|
|                                | NC                              | PC    | PHY01 | PHY02 | PHY03  | TUM   | GAR    |                              |
| Amino acids, mg/g              |                                 |       |       |       |        |       |        |                              |
| Alanine                        | 0.597                           | 0.640 | 0.491 | 0.609 | 0.740  | 0.726 | 0.497  | 0.551                        |
| Arginine                       | 0.017                           | 0.015 | 0.008 | 0.015 | 0.007  | 0.123 | 0.008  | 0.675                        |
| Asparagine                     | 0.001                           | 0.000 | 0.000 | 0.000 | 0.000  | 0.000 | 0.000  | 0.806                        |
| Aspartic acid                  | 0.275                           | 0.317 | 0.212 | 0.286 | 0.277  | 0.188 | 0.198  | 0.580                        |
| Citrulline                     | 0.006                           | 0.024 | 0.011 | 0.020 | 0.016  | 0.007 | 0.003* | 0.181                        |
| Glutamic acid                  | 0.966                           | 1.182 | 0.971 | 0.782 | 1.104  | 0.886 | 1.410  | 0.941                        |
| Glutamine                      | 0.003                           | 0.004 | 0.002 | 0.003 | 0.002  | 0.087 | 0.001  | 0.921                        |
| Glycine                        | 0.090                           | 0.122 | 0.074 | 0.083 | 0.110  | 0.131 | 0.094  | 0.916                        |
| Histidine                      | 0.006                           | 0.008 | 0.003 | 0.004 | 0.005  | 0.030 | 0.004  | 0.830                        |
| Leucine-Isoleucine             | 0.044                           | 0.028 | 0.022 | 0.043 | 0.038  | 0.074 | 0.017  | 0.312                        |
| Lysine                         | 0.171                           | 0.147 | 0.112 | 0.164 | 0.177  | 0.146 | 0.103  | 0.491                        |
| Methionine                     | 0.003                           | 0.002 | 0.001 | 0.002 | 0.002  | 0.003 | 0.001  | 0.081                        |
| Ornithine                      | 0.002                           | 0.002 | 0.005 | 0.005 | 0.014* | 0.003 | 0.008  | 0.079                        |
| Phenylalanine                  | 0.069                           | 0.053 | 0.044 | 0.064 | 0.065  | 0.107 | 0.037  | 0.403                        |
| Proline                        | 0.060                           | 0.047 | 0.039 | 0.060 | 0.074  | 0.082 | 0.034* | 0.229                        |
| r-amino-n-butyric              | 0.003                           | 0.003 | 0.004 | 0.002 | 0.003  | 0.002 | 0.002  | 0.664                        |
| Serine                         | 0.029                           | 0.023 | 0.014 | 0.029 | 0.020  | 0.079 | 0.009* | 0.275                        |
| Taurine                        | 0.000                           | 0.001 | 0.000 | 0.000 | 0.001  | 0.003 | 0.000  | 0.240                        |
| Threonine                      | 0.040                           | 0.040 | 0.027 | 0.040 | 0.034  | 0.068 | 0.019  | 0.641                        |
| Tryptophan                     | 0.002                           | 0.001 | 0.000 | 0.001 | 0.001  | 0.016 | 0.001  | 0.735                        |
| Tyrosine                       | 0.099                           | 0.057 | 0.039 | 0.082 | 0.075  | 0.150 | 0.036  | 0.328                        |
| Short chains fatty acids, mg/g |                                 |       |       |       |        |       |        |                              |
| Acetic acid                    | 29.6                            | 32.4  | 30.1  | 23.7  | 24.1   | 24.4  | 23.3   | 0.562                        |
| Propionic acid                 | 20.8                            | 21.0  | 17.4  | 14.3  | 16.3   | 15.8  | 14.4   | 0.624                        |
| Butyric acid                   | 17.4                            | 22.2  | 18.1  | 14.8  | 15.5   | 15.5  | 15.0   | 0.603                        |
| Valeric acid                   | 3.67                            | 6.05  | 4.00  | 3.50  | 4.26   | 3.56  | 3.36   | 0.573                        |
| Isovaleric acid                | 124.6                           | 57.5  | 45.7  | 49.0  | 130.3  | 58.1  | 23.9   | 0.692                        |
| Bile acids, µg/g               |                                 |       |       |       |        |       |        |                              |
| Cholic acid                    | 0.05                            | 0.10  | 0.15  | 0.00  | 0.05   | 0.00  | 0.00   | 0.515                        |

|                            |       |       |       |       |       |       |       |       |
|----------------------------|-------|-------|-------|-------|-------|-------|-------|-------|
| Chenodeoxycholic acid      | 11.9  | 19.5  | 10.0  | 26.3  | 36.6  | 72.3  | 21.5  | 0.846 |
| Lithocholic acid           | 101.2 | 111.3 | 95.1  | 119.2 | 99.1  | 130.1 | 55.1  | 0.379 |
| Taurochenodeoxycholic acid | 0.19  | 0.13  | 0.13  | 0.00* | 1.81  | 0.63  | 0.06  | 0.091 |
| Hyodeoxycholic acid        | 413.8 | 495.3 | 485.9 | 576.4 | 454.3 | 564.0 | 405.7 | 0.801 |

<sup>1</sup> Dietary treatments include antibiotic (PC), no antibiotic (NC), essential oil and herbal blend 1 (PHY01), essential oil and herbal blend 2 (PHY02), essential oil and herb blend 3 (PHY03), turmeric (TUM), and garlic (GAR).

<sup>2</sup> P-value from Kruskal Wallis one-way analysis of variance.

\* Significantly different from negative control ( $P < 0.1$ ).

**Table S7.** Effects of dietary antibiotics, phytogetic extracts, and milk-derived substances on amino acid, short chain fatty acid, and bile acid concentrations in cecal contents from experiment 2.

| Analyte                        | Dietary treatments <sup>1</sup> |                  |                   |                   |                  |                   | <i>P</i> -value <sup>2</sup> |
|--------------------------------|---------------------------------|------------------|-------------------|-------------------|------------------|-------------------|------------------------------|
|                                | NC                              | PC               | BOE               | SOE               | VM01             | VSM02             |                              |
| Amino acids, mg/g              |                                 |                  |                   |                   |                  |                   |                              |
| Alanine                        | 0.301                           | 0.283            | 0.406             | 0.349             | 0.406            | 0.279             | 0.474                        |
| Arginine                       | 0.006                           | 0.006            | 0.035             | 0.003             | 0.005            | 0.003             | 0.581                        |
| Asparagine                     | 0.000                           | 0.000            | 0.044             | 0.000             | 0.000            | 0.000             | 0.445                        |
| Aspartic acid                  | 0.226                           | 0.171            | 0.271             | 0.206             | 0.175            | 0.220             | 0.474                        |
| Citrulline                     | 0.006                           | 0.001            | 0.003             | 0.004             | 0.001            | 0.007             | 0.284                        |
| Glutamic acid                  | 0.679                           | 0.558            | 0.712             | 0.722             | 0.572            | 0.805             | 0.474                        |
| Glutamine                      | 0.001                           | 0.001            | 0.047             | 0.004             | 0.001            | 0.001             | 0.170                        |
| Glycine                        | 0.035                           | 0.030            | 0.085             | 0.050             | 0.034            | 0.049             | 0.474                        |
| Histidine                      | 0.002                           | 0.002            | 0.019             | 0.005             | 0.003            | 0.002             | 0.268                        |
| Leucine-Isoleucine             | 0.013                           | 0.008            | 0.038             | 0.011             | 0.011            | 0.012             | 0.670                        |
| Lysine                         | 0.081                           | 0.063            | 0.145             | 0.063             | 0.059            | 0.087             | 0.474                        |
| Methionine                     | 0.001                           | 0.000            | 0.005             | 0.001             | 0.001            | 0.001             | 0.805                        |
| Ornithine                      | 0.007                           | 0.001            | 0.033             | 0.003             | 0.005            | 0.009             | 0.241                        |
| Phenylalanine                  | 0.025                           | 0.023            | 0.053             | 0.023             | 0.026            | 0.026             | 0.495                        |
| Proline                        | 0.026                           | 0.026            | 0.053             | 0.032             | 0.027            | 0.026             | 0.522                        |
| r-amino-n-butyric              | 0.004                           | 0.001            | 0.003             | 0.004             | 0.004            | 0.003             | 0.299                        |
| Serine                         | 0.010                           | 0.005            | 0.044             | 0.007             | 0.006            | 0.007             | 0.454                        |
| Taurine                        | 0.000                           | 0.004            | 0.003             | 0.001             | 0.006            | 0.002             | 0.203                        |
| Threonine                      | 0.027                           | 0.017            | 0.039             | 0.022             | 0.018            | 0.019             | 0.509                        |
| Tryptophan                     | 0.001                           | 0.001            | 0.007             | 0.000             | 0.001            | 0.001             | 0.213                        |
| Tyrosine                       | 0.048                           | 0.032            | 0.102             | 0.034             | 0.052            | 0.042             | 0.435                        |
| Short chains fatty acids, mg/g |                                 |                  |                   |                   |                  |                   |                              |
| Acetic acid                    | 33.4                            | 34.2             | 29.9              | 28.6              | 26.4*            | 32.7              | 0.548                        |
| Propionic acid                 | 20.0                            | 21.9             | 18.7              | 16.8              | 16.2*            | 22.3              | 0.372                        |
| Butyric acid                   | 22.2                            | 25.0             | 19.2              | 17.8*             | 17.2*            | 20.2              | 0.131                        |
| Valeric acid                   | 5.3 <sup>ab</sup>               | 7.5 <sup>a</sup> | 4.5 <sup>ab</sup> | 4.4 <sup>ab</sup> | 4.2 <sup>b</sup> | 4.5 <sup>ab</sup> | 0.039                        |
| Isovaleric acid                | 22.5                            | 66.7             | 48.2              | 129.9             | 60.1             | 157.9             | 0.164                        |

|                            | Bile acids, µg/g |        |       |       |       |       |       |
|----------------------------|------------------|--------|-------|-------|-------|-------|-------|
| Cholic acid                | 0.00             | 0.00   | 0.20  | 0.00  | 0.00  | 0.00  | 0.394 |
| Chenodeoxycholic acid      | 17.8             | 8.0    | 42.6  | 21.3  | 17.1  | 65.9  | 0.538 |
| Lithocholic acid           | 59.0             | 138.3* | 76.1  | 96.6  | 71.0  | 110.6 | 0.279 |
| Taurochenodeoxycholic acid | 0.40             | 0.90   | 0.10  | 0.10  | 0.50  | 7.3   | 0.385 |
| Hyodeoxycholic acid        | 393.4            | 472.1  | 455.8 | 500.1 | 366.6 | 457.2 | 0.898 |

<sup>1</sup> Dietary treatments include antibiotic (PC), no antibiotic (NC), bitter orange extract (BOE), sweet orange extract (SOE), volatile milk-derived substances (VM01), and volatile & semi-volatile milk-derived substances (VSM02).

<sup>2</sup> P-value from Kruskal Wallis one-way analysis of variance.

\* Significantly different from negative control ( $P < 0.1$ ).

<sup>a,b</sup> Means within a row with uncommon superscripts differ ( $P < 0.05$ ).

**Table S8.** Effects of dietary antibiotics and yeast products on amino acid, short chain fatty acid, and bile acid concentrations in cecal contents from experiment 3.

| Analyte                        | Dietary treatments <sup>1</sup> |                    |                    |                    |                    | <i>P</i> -value <sup>2</sup> |
|--------------------------------|---------------------------------|--------------------|--------------------|--------------------|--------------------|------------------------------|
|                                | NC                              | PC                 | YN01               | YN02               | YC03               |                              |
| Amino acids, mg/g              |                                 |                    |                    |                    |                    |                              |
| Alanine                        | 0.493                           | 0.634              | 0.382              | 0.405              | 0.502              | 0.060                        |
| Arginine                       | 0.002                           | 0.002              | 0.001              | 0.001              | 0.005              | 0.095                        |
| Asparagine                     | 0.000                           | 0.000              | 0.000              | 0.000              | 0.000              | 0.694                        |
| Aspartic acid                  | 0.203                           | 0.266              | 0.129              | 0.205              | 0.204              | 0.196                        |
| Citrulline                     | 0.006                           | 0.013              | 0.002              | 0.004              | 0.001*             | 0.051                        |
| Glutamic acid                  | 0.642 <sup>b</sup>              | 0.982 <sup>a</sup> | 0.360 <sup>c</sup> | 0.582 <sup>b</sup> | 0.586 <sup>b</sup> | 0.046                        |
| Glutamine                      | 0.000                           | 0.000              | 0.000              | 0.000              | 0.001              | 0.179                        |
| Glycine                        | 0.045                           | 0.068              | 0.027              | 0.033              | 0.050              | 0.175                        |
| Histidine                      | 0.001 <sup>b</sup>              | 0.002 <sup>a</sup> | 0.001 <sup>b</sup> | 0.001 <sup>b</sup> | 0.001 <sup>b</sup> | 0.039                        |
| Leucine-Isoleucine             | 0.020 <sup>b</sup>              | 0.030 <sup>a</sup> | 0.013 <sup>b</sup> | 0.018 <sup>b</sup> | 0.022 <sup>b</sup> | 0.032                        |
| Lysine                         | 0.095 <sup>b</sup>              | 0.128 <sup>a</sup> | 0.047 <sup>b</sup> | 0.083 <sup>b</sup> | 0.087 <sup>b</sup> | 0.013                        |
| Methionine                     | 0.001                           | 0.002              | 0.001              | 0.001              | 0.002              | 0.076                        |
| Ornithine                      | 0.002                           | 0.006              | 0.001              | 0.001              | 0.003              | 0.396                        |
| Phenylalanine                  | 0.036 <sup>b</sup>              | 0.046 <sup>a</sup> | 0.023 <sup>b</sup> | 0.030 <sup>b</sup> | 0.039 <sup>b</sup> | 0.012                        |
| Proline                        | 0.039                           | 0.042              | 0.029              | 0.037              | 0.038              | 0.351                        |
| r-amino-n-butyric              | 0.014 <sup>a</sup>              | 0.015 <sup>a</sup> | 0.005 <sup>b</sup> | 0.012 <sup>a</sup> | 0.015 <sup>a</sup> | 0.028                        |
| Serine                         | 0.000                           | 0.001              | 0.001              | 0.000              | 0.000              | 0.407                        |
| Taurine                        | 0.019                           | 0.025              | 0.010              | 0.021              | 0.022              | 0.103                        |
| Threonine                      | 0.000                           | 0.001              | 0.000              | 0.000              | 0.000              | 0.059                        |
| Tryptophan                     | 0.023                           | 0.034              | 0.012              | 0.017              | 0.025              | 0.126                        |
| Tyrosine                       | 0.027 <sup>b</sup>              | 0.045 <sup>a</sup> | 0.015 <sup>b</sup> | 0.023 <sup>b</sup> | 0.029 <sup>b</sup> | 0.004                        |
| Short chains fatty acids, mg/g |                                 |                    |                    |                    |                    |                              |
| Acetic acid                    | 36.1                            | 41.2               | 37.0               | 36.8               | 42.0               | 0.480                        |
| Propionic acid                 | 23.7                            | 26.9               | 24.0               | 23.8               | 25.3               | 0.574                        |
| Butyric acid                   | 27.3                            | 28.5               | 26.1               | 25.0               | 30.9               | 0.340                        |
| Valeric acid                   | 7.4                             | 7.7                | 7.1                | 6.4                | 8.9                | 0.181                        |
| Isovaleric acid                | 19.2                            | 32.8               | 9.3                | 6.1                | 9.0                | 0.979                        |

|                            |                   | Bile acids, µg/g  |                   |                   |                   |       |
|----------------------------|-------------------|-------------------|-------------------|-------------------|-------------------|-------|
| Cholic acid                | 0.00 <sup>b</sup> | 0.36 <sup>a</sup> | 0.00 <sup>b</sup> | 0.00 <sup>b</sup> | 0.00 <sup>b</sup> | 0.002 |
| Chenodeoxycholic acid      | 15.5              | 30.0              | 15.2              | 8.7               | 7.6               | 0.775 |
| Lithocholic acid           | 151.3             | 151.9             | 126.5             | 115.7             | 117.0             | 0.535 |
| Taurochenodeoxycholic acid | 0.00              | 0.00              | 0.06              | 0.00              | 0.00              | 0.406 |
| Hyodeoxycholic acid        | 697.8             | 764.6             | 614.3             | 542.5             | 589.8             | 0.981 |

<sup>1</sup> Dietary treatments include antibiotic (PC), no antibiotic (NC), yeast nucleotide product 1 (YN01), yeast nucleotide product 2 (YN02), and yeast cell wall (YC03) product.

<sup>2</sup> P-value from Kruskal Wallis one-way analysis of variance.

\* Significantly different from negative control ( $P < 0.1$ ).

<sup>a,b,c</sup> Means within a row with uncommon superscripts differ ( $P < 0.05$ ).

**Table S9.** Cecal metabolites with high abundance and specificity to pigs fed antibiotics, essential oils and herbal blends, phytogetic extracts, milk-derived substances, and yeast products compared with pigs fed the negative control diets.

| Metabolite <sup>1</sup> | Metabolite identification <sup>2</sup> | Experiment | Treatment <sup>3</sup> | Indicator value <sup>4</sup> | Negative control mean <sup>5</sup> ± standard deviation | Treatment mean <sup>5</sup> ± standard deviation | P-value <sup>6</sup> |
|-------------------------|----------------------------------------|------------|------------------------|------------------------------|---------------------------------------------------------|--------------------------------------------------|----------------------|
| 2.95_279.0918_po        | Sulfadimidine                          | 1          | PC                     | 1.000                        | 0 ± 0                                                   | 0.764 ± 0.192                                    | 0.001                |
| 3.29_321.1024_po        | N4-Acetylsulfadimidine                 | 1          | PC                     | 1.000                        | 0 ± 0                                                   | 0.082 ± 0.051                                    | 0.001                |
| 3.74_479.1220_po        | Chlortetracycline                      | 1          | PC                     | 1.000                        | 0 ± 0                                                   | 0.275 ± 0.063                                    | 0.001                |
| 3.31_479.1221_po        | Chlortetracycline                      | 1          | PC                     | 1.000                        | 0 ± 0                                                   | 0.214 ± 0.076                                    | 0.001                |
| 4.28_479.1227_po        | Chlortetracycline                      | 1          | PC                     | 1.000                        | 0 ± 0                                                   | 0.356 ± 0.078                                    | 0.001                |
| 2.06_237.1603_po        | Metabutethamine                        | 1          | PHY02                  | 0.940                        | 0.004 ± 0.003                                           | 0.064 ± 0.071                                    | 0.041                |
| 5.43_321.1267_dc        | Butyramide                             | 1          | PHY03                  | 0.834                        | 0.033 ± 0.038                                           | 0.168 ± 0.071                                    | 0.001                |
| 6.31_300.1031_dc        |                                        | 1          | PHY03                  | 0.815                        | 0.034 ± 0.041                                           | 0.149 ± 0.067                                    | 0.002                |
| 1.76_181.9900_ne        | Ibervirin                              | 1          | GAR                    | 1.000                        | 0 ± 0                                                   | 0.051 ± 0.017                                    | 0.001                |
| 2.95_279.0918_po        | Sulfadimidine                          | 2          | PC                     | 1.000                        | 0 ± 0                                                   | 0.855 ± 0.169                                    | 0.001                |
| 3.29_321.1024_po        | N4-Acetylsulfadimidine                 | 2          | PC                     | 1.000                        | 0 ± 0                                                   | 0.094 ± 0.040                                    | 0.001                |
| 3.29_321.1024_po        | N4-Acetylsulfadimidine                 | 3          | PC                     | 1.000                        | 0 ± 0                                                   | 0.059 ± 0.026                                    | 0.001                |
| 3.74_479.1220_po        | Chlortetracycline                      | 3          | PC                     | 1.000                        | 0 ± 0                                                   | 0.197 ± 0.066                                    | 0.001                |
| 3.31_479.1221_po        | Chlortetracycline                      | 3          | PC                     | 1.000                        | 0 ± 0                                                   | 0.103 ± 0.029                                    | 0.001                |
| 4.28_479.1227_po        | Chlortetracycline                      | 3          | PC                     | 1.000                        | 0.003 ± 0                                               | 0.286 ± 0.107                                    | 0.001                |
| 2.95_279.0918_po        | Sulfadimidine                          | 3          | PC                     | 0.993                        | 0.003 ± 0.014                                           | 0.716 ± 0.170                                    | 0.001                |
| 4.09_331.2475_ne        | Phloionolic acid                       | 3          | YN02                   | 0.875                        | 0.011 ± 0                                               | 0.048 ± 0.026                                    | 0.001                |

<sup>1</sup>Metabolite characteristics listed as retention time-mass method of derivatization used [either negative mode (ne), positive mode (po), dansyl chloride (DC), or 2-hydrazinoquinoline (HQ)].

<sup>2</sup>Metabolite identification based on database search of the adjusted mass. Identification was left blank if no metabolite was identified with this mass.

<sup>3</sup>Dietary treatments include antibiotics (PC), essential oil and herb mixture 2 (PHY02), essential oil and herb mixture 3 (PHY03), garlic (GAR), and yeast nucleotide 2 (YN02).

<sup>4</sup>The indicator value is a product of frequency and abundance and ranges from 0 to 1. Greater indicator values show that a given taxon is more abundant in all samples from a given group compared with other groups. The table shows indicator values greater than 0.8, indicating that the selected metabolites are faithful biomarkers of a given treatment.

<sup>5</sup>Means expressed as relative abundance with respect to all metabolites (%).

<sup>6</sup>P-value from Kruskal Wallis one-way analysis of variance.
